# Supplementary material
Source: PubMed Central journal article supplement (PMC3811536)
Supplement: AEM.01814-13_zam999104844so1.pdf [file AEM.01814-13_zam999104844so1.pdf]

TABLE S1. MAR4 isolates from Channel Island sediments.

| Strain number | Location                    | Processing method  | Isolation media                | NCBI accession number |
|---------------|-----------------------------|--------------------|--------------------------------|-----------------------|
| CNY-714       | 34° 02.67' N, 119° 32.67' W | dry, stamp         | trace mineral + cycloheximide  | KC261606              |
| CNY-715       | 33° 58.39' N, 118° 57.22' W | no pretreatment    | sea water agar + cycloheximide | KC261604              |
| CNY-716       | 34° 02.67' N, 119° 32.67' W | enrichment culture | 1/5 A1 + cycloheximide         | KC261615              |
| CNY-717       | 34° 01.99' N, 119° 42.14' W | dry, stamp         | trace mineral + cycloheximide  | KC261622              |
| CNY-718       | 33° 58.39' N, 118° 57.22' W | no pretreatment    | sea water agar + cycloheximide | KC261611              |

TABLE S2. Primers used in study.

| Primer name | Forward or Reverse | Specificity      | Sequence 5'- 3'          |
|-------------|--------------------|------------------|--------------------------|
| FC27        | F                  | General bacteria | AGAGTTTGATCCTGGCTGGCTCAG |
| RC1492      | R                  | General bacteria | TACGGCTACCTTGTTACGACTT   |
| F7          | F                  | Actinobacteria   | TGCACTCTGGGACAAGCCCT     |
| MAR4_R3     | R                  | MAR4             | AGTCTCCCGTGAGTCCCCAC     |
| MAR4_F5     | F                  | MAR4             | ACYWYYGGGCGCATGYCTG      |
| MAR4_F6     | F                  | MAR4             | WYYGGGCGCATGYCTGDKR      |

TABLE S3. Primers used for nested PCR amplification of MAR4 16S rRNA gene sequences from environmental samples. + Indicates primers sets that yielded PCR products. In some cases, two separate nested PCR reactions were performed using different second round primers.

| <b>Sample no.</b> | <b>1<sup>st</sup> round<br/>FC27/RC1492</b> | <b>1<sup>st</sup> round<br/>F7/MAR4_R3</b> | <b>2<sup>nd</sup> round<br/>MAR4_F5/ MAR4_R3</b> | <b>2<sup>nd</sup> round<br/>MAR4_F6/ MAR4_R3</b> |
|-------------------|---------------------------------------------|--------------------------------------------|--------------------------------------------------|--------------------------------------------------|
| 26                | +                                           | -                                          | -                                                | +                                                |
| 153               | -                                           | +                                          | -                                                | +                                                |
| 280               | -                                           | +                                          | +                                                | +                                                |
| 407               | +                                           | -                                          | +                                                | +                                                |

TABLE S4. Cultured and cloned MAR4 sequences. Bold locations indicate strains isolated from marine samples. Strain numbers beginning with “CN” are maintained in the SIO culture collection. References for strains that were not isolated as a part of this study are indicated when available. \*All cloned sequences are from Santa Cruz Island except where indicated. \*\* Strains included in secondary metabolite analysis.

| OTU no. | No. clones*<br>(accession no.) | Cultured strains<br>(accession no.)                | Source of cultured strains             | Reference                |
|---------|--------------------------------|----------------------------------------------------|----------------------------------------|--------------------------|
| 1       | 0                              | CNX-435<br>(KC261602)**                            | <b>California</b>                      |                          |
| 2       | 2                              | 0                                                  | -                                      |                          |
| 3       | 0                              | CNS-776<br>(EU214946)**                            | <b>California</b>                      | Prieto-Davo et al., 2008 |
| 4       | 0                              | CNY-715<br>(KC261604)**<br>CNP-082<br>(KC261603)** | <b>California</b><br><b>California</b> |                          |
| 5       | Washington<br>(HM186499)       | 0                                                  | -                                      | Lin et al., 2011         |
| 6       | 1                              | 0                                                  | -                                      |                          |
| 7       | 3                              | CNB-632<br>(KC261626)**                            | <b>California</b>                      |                          |
| 8       | 0                              | (EF121313)                                         | Egypt sand dune                        | Hozzein et al., 2007     |
| 9       | 2                              | CNH-099<br>(KC261627)**<br>CNQ-181<br>(EU214926)** | <b>California</b><br><b>California</b> | Prieto-Davo et al., 2008 |
| 10      | 7                              | 0                                                  | -                                      |                          |
| 11      | 1                              | 0                                                  | -                                      |                          |
| 12      | 8                              | (JQ014483)<br>(JQ014364)                           | Lechuguilla Cave<br>Lechuguilla Cave   |                          |

|    |     |                    |                                |                               |
|----|-----|--------------------|--------------------------------|-------------------------------|
|    |     | CNQ-329 (KC261610) | <b>California</b>              |                               |
|    |     | CNS-581            | <b>California</b>              |                               |
|    |     | (KC261621)**       |                                |                               |
|    |     | CNQ-509            | <b>California</b>              | Prieto-Davo et al., 2008      |
|    |     | (EF581384)**       |                                |                               |
|    |     | CNS-686            | <b>California</b>              | Prieto-Davo et al., 2008      |
|    |     | (EU214957)**       |                                |                               |
|    |     | CNQ-384 (KC261605) | <b>California</b>              |                               |
|    |     | CNR-925 (DQ448742) | <b>Palau</b>                   | Gontang et al., 2007          |
|    |     | CNQ-766            | <b>Guam</b>                    | Jensen and Fenical,<br>2005   |
|    |     | (AY464546)**       |                                |                               |
| 13 | 105 | (NR_041166)        | Japan soil                     | Labeda et al., 2012           |
|    |     | CNQ-260 (KC261613) | <b>California</b>              |                               |
|    |     | CNQ-525            | <b>California</b>              | Soria-Mercado et al.,<br>2005 |
|    |     | (EF177816)**       |                                |                               |
|    |     | CNY-716            | <b>California</b>              |                               |
|    |     | (KC261615)**       |                                |                               |
|    |     | CNQ-139            | <b>California</b>              |                               |
|    |     | (KC261614)**       |                                |                               |
| 14 | 0   | (JQ014513)         | Lechuguilla Cave               |                               |
|    |     | (JQ014571)         | Lechuguilla Cave               |                               |
|    |     | CNH-070 (KC261625) | <b>California</b>              |                               |
|    |     | CNX-496 (KC261624) | <b>Palmyra</b>                 |                               |
|    |     | (EU741176)         | <b>Caribbean beach sand</b>    | Solano et al., 2009           |
|    |     | (JQ014418)         | Lechuguilla Cave               |                               |
|    |     | CNT-371 (KC261612) | <b>Fiji</b>                    |                               |
|    |     | CNQ-904 (KC261616) | <b>Guam</b>                    |                               |
|    |     | (HQ537077)         | <b>sponge, South China Sea</b> | Wang et al., 2011             |
|    |     | (HQ992743)         | unknown                        |                               |

|    |    |                                                                                                                                                                                                                                                                                                                                                                           |                                                                                                          |                                            |
|----|----|---------------------------------------------------------------------------------------------------------------------------------------------------------------------------------------------------------------------------------------------------------------------------------------------------------------------------------------------------------------------------|----------------------------------------------------------------------------------------------------------|--------------------------------------------|
|    |    | (JQ782978)<br>(JF346436)<br>CNY-717<br>(KC261622)**<br>CNQ-031 (KC261620)<br>(EU741167)<br>(EU741161)<br>(FJ263416)<br>CNS-580 (KC261618)<br>CNY-718<br>(KC261611)**<br>CNQ-428 (KC261608)<br>(FJ261966)<br>CNQ-865<br>(KC261619)**<br>CNX-232 (KC261623)<br>CNQ-381 (KC261617)<br>(FJ615277)<br>CNQ-907 (KC261609)<br>CNS-335<br>(KC261607)**<br>CNY-714<br>(KC261606)** | <b>Yellow Sea<br/>marine sponge<br/>California</b>                                                       |                                            |
|    |    |                                                                                                                                                                                                                                                                                                                                                                           | <b>California<br/>Caribbean beach sand<br/>Caribbean beach sand<br/>mangrove<br/>Fiji<br/>California</b> | Solano et al., 2009<br>Solano et al., 2009 |
|    |    |                                                                                                                                                                                                                                                                                                                                                                           | <b>California<br/>California<br/>mangrove<br/>Guam</b>                                                   |                                            |
|    |    |                                                                                                                                                                                                                                                                                                                                                                           | <b>California<br/>California<br/>plant endophyte<br/>Guam<br/>Fiji</b>                                   | Qin et al., 2009                           |
|    |    |                                                                                                                                                                                                                                                                                                                                                                           | <b>California</b>                                                                                        |                                            |
| 15 | 0  | (EF538742)<br>(EU267797)<br>(AB373966)                                                                                                                                                                                                                                                                                                                                    | <b>mangrove<br/>Xiaoping Islands<br/>Japan soil</b>                                                      | Zhao et al., 2009                          |
| 16 | 1  | 0                                                                                                                                                                                                                                                                                                                                                                         | -                                                                                                        |                                            |
| 17 | 37 | CNX-198<br>(KC261629)**                                                                                                                                                                                                                                                                                                                                                   | <b>California</b>                                                                                        |                                            |

CNS-284  
(KC261628)\*\*

Palau

|    |   |            |                  |
|----|---|------------|------------------|
| 18 | 3 | 0          | -                |
| 19 | 0 | (X87316)   | unknown          |
| 20 | 0 | (JQ014508) | Lechuguilla Cave |
| 21 | 1 | 0          | -                |
| 22 | 1 | 0          | -                |
| 23 | 1 | 0          | -                |
| 24 | 1 | 0          | -                |
| 25 | 1 | 0          | -                |
| 26 | 1 | 0          | -                |
| 27 | 1 | 0          | -                |
| 28 | 2 | 0          | -                |

FIGURE S1. 16S rRNA gene maximum likelihood phylogeny of MAR4 strains and BLAST matches. The MAR4 clade is highlighted in blue. No conflicting nodes were detected using parsimony methods. Red asterisks indicate nodes supported by  $\geq 50\%$  using both maximum likelihood (bootstrap) and parsimony (jackknife) methods. A purple asterisk indicates nodes supported by only one of these methods.

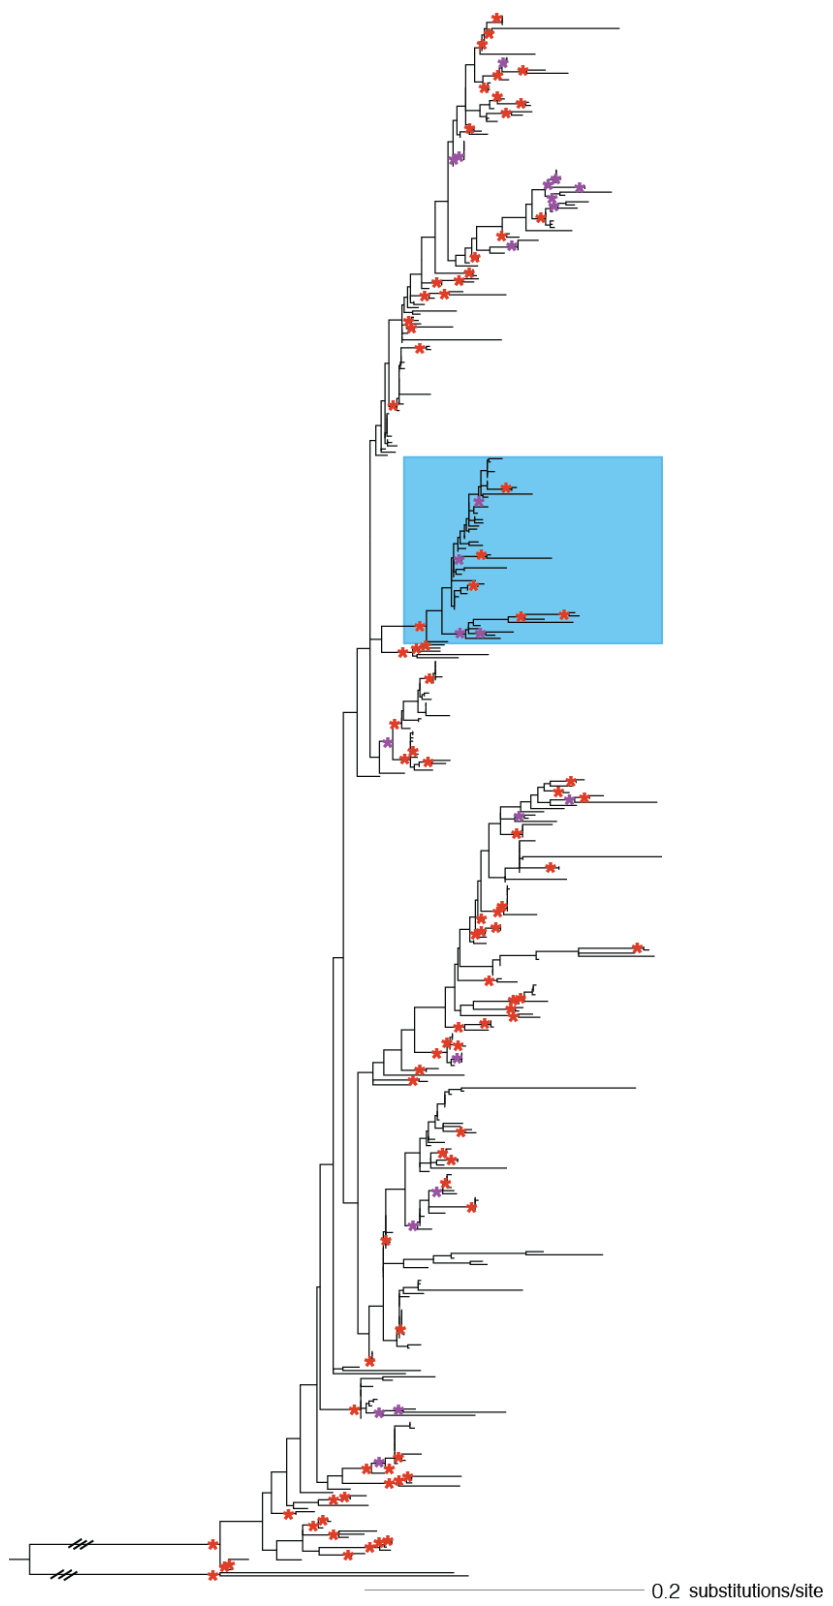

FIGURE S2. UV spectra for compounds in culture extracts (blue) in comparison with known HIs (red). (A) napyradiomycin A2, match score = 983; (B) lavanducyanin, match score = 989; (C) marinone, match score = 996; and (D) nitropyrrolin A, match score = 983. Match scores >900 were considered positive identification for that compound class. Match scores ranged from 903-999 and averaged 969.

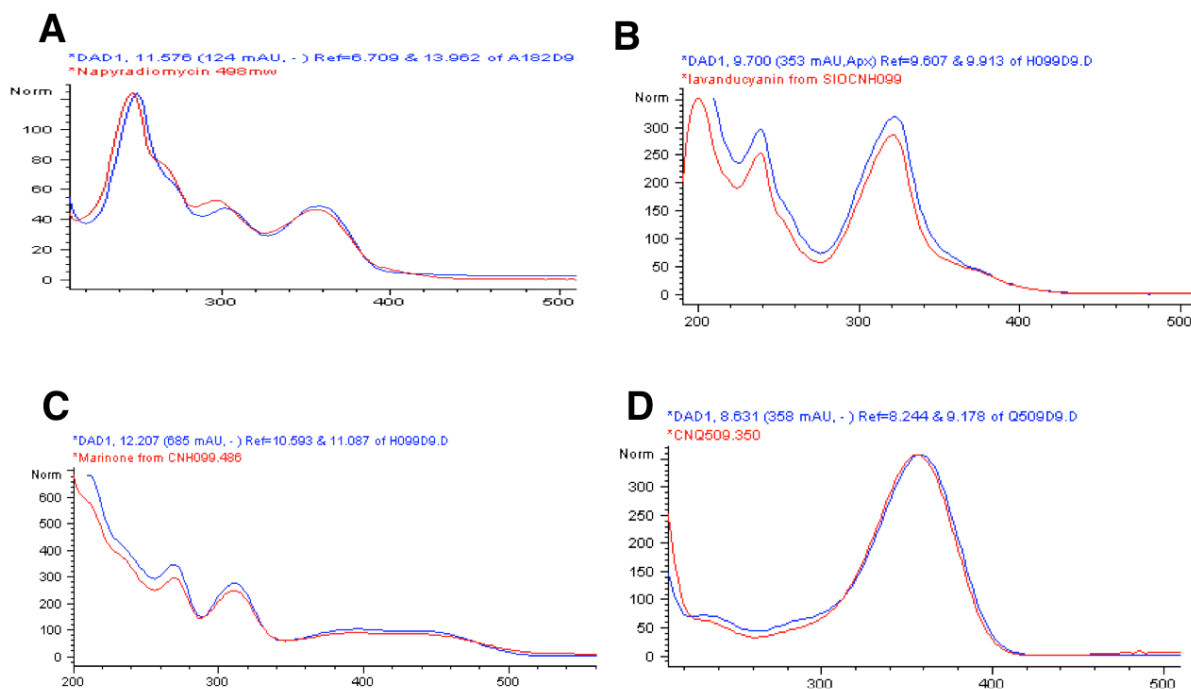



FIGURE S3. Identification of prenylated phenazine. (A) Parent ion. (B) MS2 fragmentation of parent ion. Fragments corresponding to a monoterpene\*, phenazine-1-carboxylic acid (PCA\*\*), and PCA with a methyl substituent are observed. (C) UV spectra for the prenylated phenazine observed in this study and related compounds (Moree et. al., 2012).

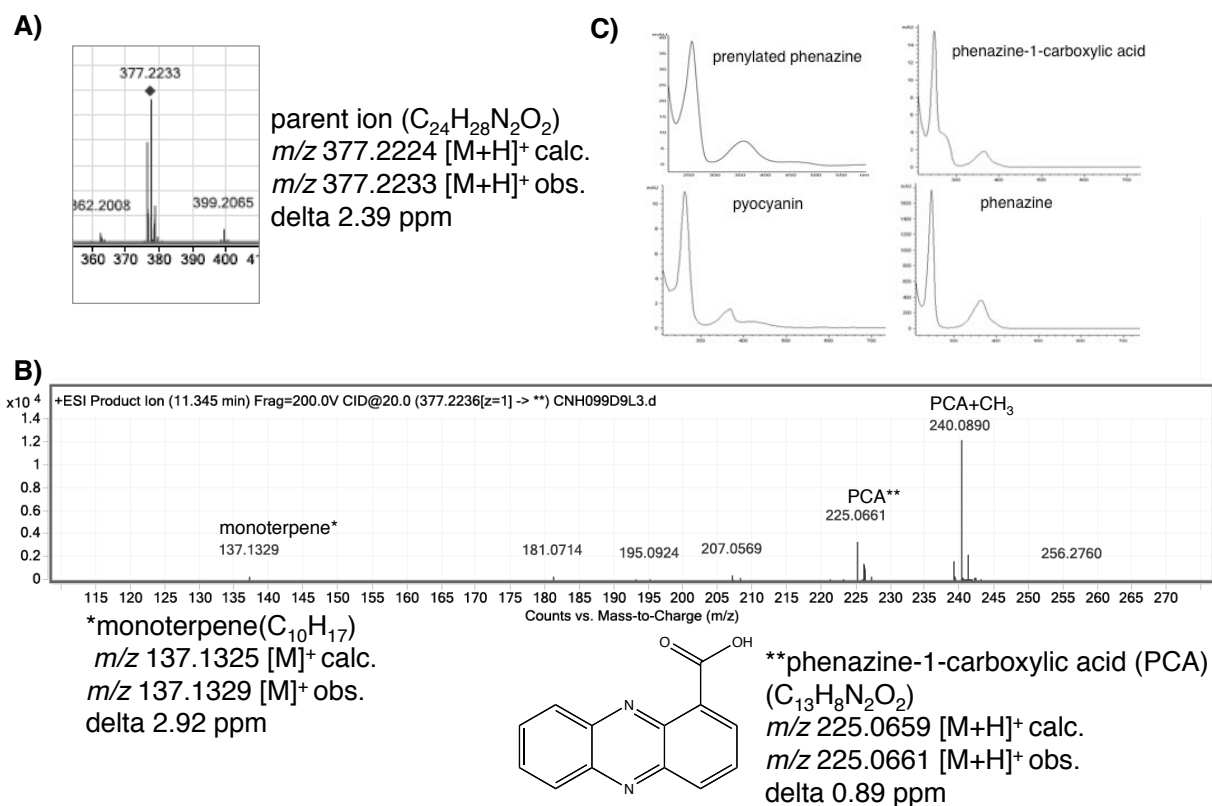

## References

- Gontang EA, Fenical W, Jensen PR (2007). Phylogenetic diversity of gram-positive bacteria cultured from marine sediments. *Applied and Environmental Microbiology* 73: 3272-3282.
- Hozzein WN, Goodfellow M (2007). *Streptomyces synnematoformans* sp nov., a novel actinomycete isolated from a sand dune soil in Egypt. *International Journal of Systematic and Evolutionary Microbiology* 57: 2009-2013.
- Jensen PR, Fenical W (2005). New natural-product diversity from marine actinomycetes. *Natural Products: Drug Discovery and Therapeutic Medicine*: 315-328.

- Labeda DP, Goodfellow M, Brown R, Ward AC, Lanoot B, Vannanneyt M et al (2012). Phylogenetic study of the species within the family Streptomycetaceae. *Antonie Van Leeuwenhoek International Journal of General and Molecular Microbiology* 101: 73-104.
- Lin X, Kennedy D, Fredrickson J, Bjornstad B, Konopka A (2012). Vertical stratification of subsurface microbial community composition across geological formations at the Hanford Site. *Environmental Microbiology* 14.
- Moree WJ, Phelan VV, Wu C-H, Bandeira N, Cornett DS, Duggan BM et al (2012). Interkingdom metabolic transformations captured by microbial imaging mass spectrometry. *Proceedings of the National Academy of Sciences* 109: 13811-13816.
- Prieto-Davo A, Fenical W, Jensen PR (2008). Comparative actinomycete diversity in marine sediments. *Aquatic Microbial Ecology* 52: 1-11.
- Qin S, Li J, Chen H-H, Zhao G-Z, Zhu W-Y, Jiang C-L et al (2009). Isolation, Diversity, and Antimicrobial Activity of Rare Actinobacteria from Medicinal Plants of Tropical Rain Forests in Xishuangbanna, China. *Applied and Environmental Microbiology* 75: 6176-6186.
- Solano G, Rojas-Jimenez K, Jaspars M, Tamayo-Castillo G (2009). Study of the diversity of culturable actinomycetes in the North Pacific and Caribbean coasts of Costa Rica. *Antonie Van Leeuwenhoek International Journal of General and Molecular Microbiology* 96: 71-78.
- Soria-Mercado IE, Prieto-Davo A, Jensen PR, Fenical W (2005). Antibiotic terpenoid chloro-dihydroquinones from a new marine actinomycete. *Journal of Natural Products* 68: 904-910.
